# Supplementary material for: The activity and expression of microRNAs in prostate cancers
Source: Royal Society of Chemistry journal article supplement (doi:10.1039/c0mb00100g), 2010-10-19
Supplement: c0mb00100gtable3.pdf [file c0mb00100gtable3.pdf]

**Table S3: Meta-analysis of the expressions of miRNA-based repression related genes in prostate cancers**

| <b>Symbol</b> | <b>Z<sub>EX</sub>(T/N)</b> | <b>Q<sub>EX</sub>(T&gt;N)</b> | <b>Q<sub>EX</sub>(T&lt;N)</b> |
|---------------|----------------------------|-------------------------------|-------------------------------|
| TRBP          | 8.74                       | 4.243E-17                     | 1                             |
| RBM4          | 8.28                       | 1.702E-15                     | 1                             |
| PAT1          | 7.49                       | 6.35E-13                      | 1                             |
| Dicer         | 5.53                       | 1.354E-07                     | 1                             |
| AGO2          | 5.25                       | 5.604E-07                     | 1                             |
| TNRC6B        | 5.18                       | 8.101E-07                     | 1                             |
| DCP2          | 1.61                       | 0.132539                      | 0.05524                       |
| RCK           | 1.44                       | 0.178133                      | 1                             |
| EIF6          | 0.42                       | 0.6222527                     | 1                             |
| IRP1          | -5.95                      | 1                             | 2.44E-08                      |

**Z<sub>EX</sub>(T/N):** The Stouffer Z statistics of differential mRNA expression between prostate tumors(T) and normal tissues(N).

**Q<sub>EX</sub>(T>N):** q-value (the expression of mRNA in prostate tumors greater than that in normal tissues).

**Q<sub>EX</sub>(T<N):** q-value (the expression of mRNA in prostate tumors less than that in normal tissues).
